# Supplementary material for: Cardiomyocyte ploidy is dynamic during postnatal development and varies across genetic backgrounds
Source: Oxford University Press journal article supplement (doi:10.1242/dev.201318), 2023-03-13
Supplement: dev201318supp.pdf [file dev201318supp.pdf]

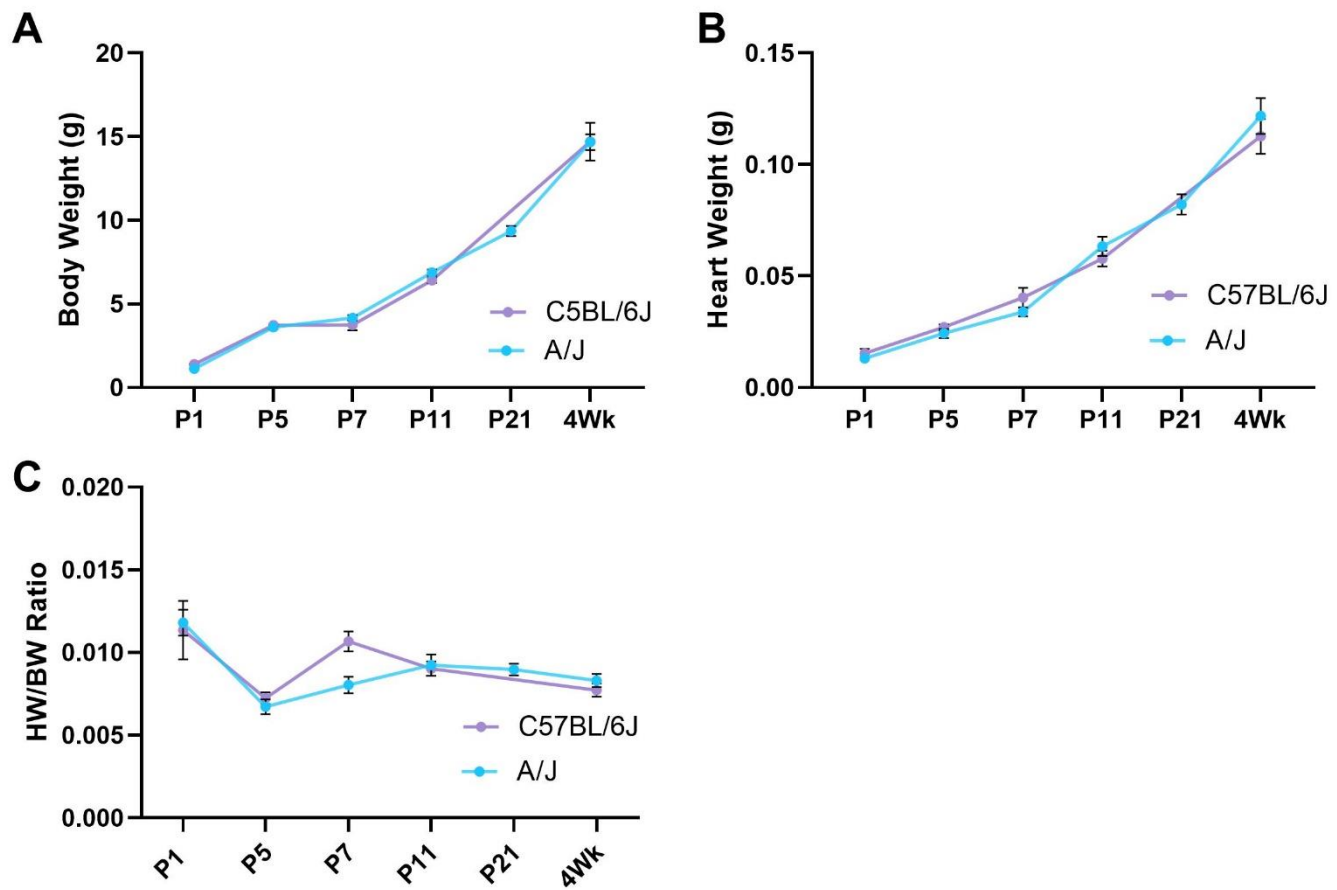

**Fig. S1. (A)** Body weight in grams (g) across A/J and C57BL/6J. **(B)** Heart weight in grams (g) across A/J and C57BL/6J. **(C)** HW/BW ratio in A/J and C57BL/6J. N=4-25 (see Supp table 3 for detailed N.)

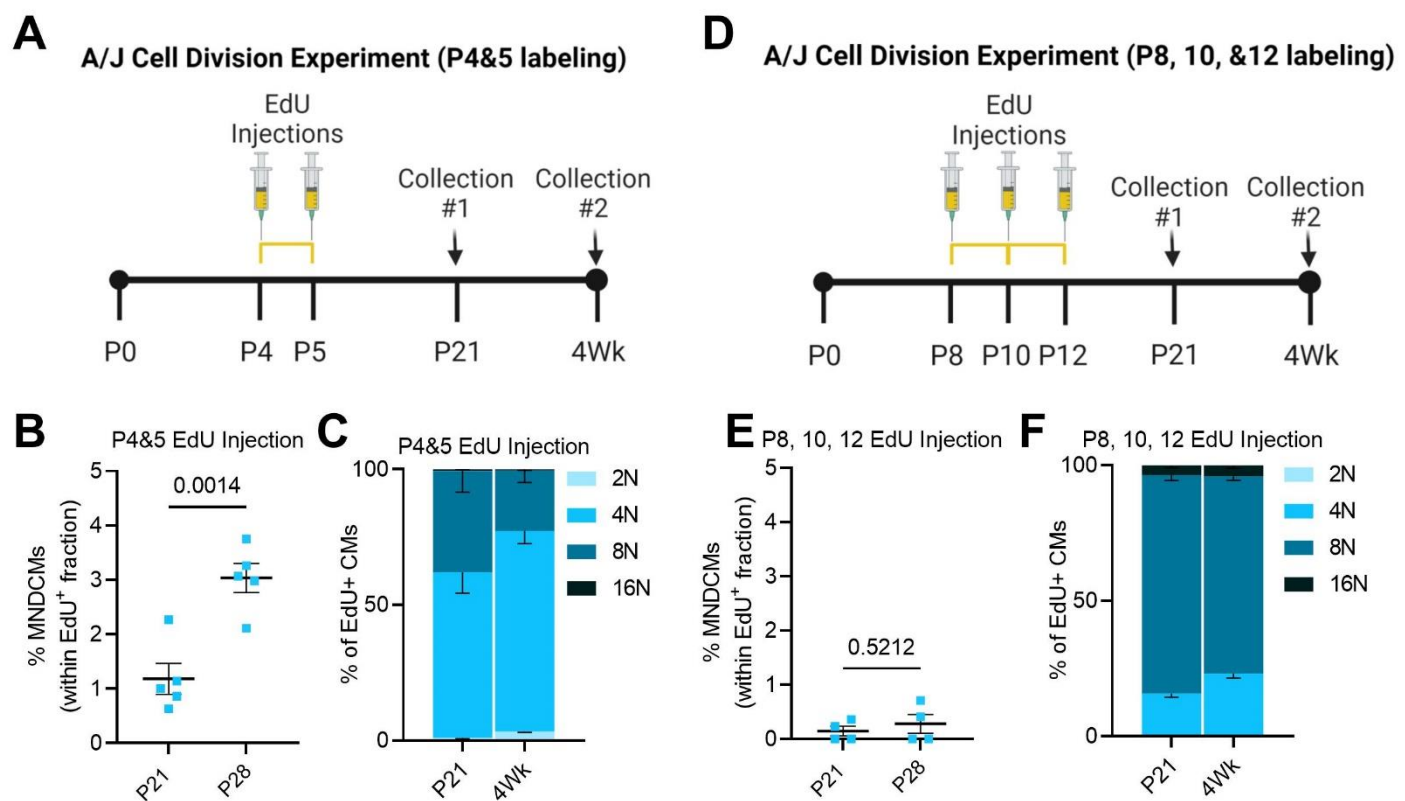

**Fig. S2. (A)** Schematic EdU injection regimen on A/J mice for single cell suspension analysis of ploidy and cell division. Single EdU injections on P4 and P5 and collection at P21 or 4 weeks (Wks). **(B)** Quantifications of EdU-positive MNDCMs as a percent of total EdU-positive cardiomyocytes in A/J mice. P-value calculated first by MANOVA of all populations in panel C, followed by a two-tailed Student's t-test. **(C)** Quantifications of EdU-positive cardiomyocytes broken down into total DNA content (i.e. 2N, 4N, 8N, or 16N) following Experimental paradigm described in panel A. **(D)** Schematic EdU injection regimen on A/J mice for single cell suspension analysis of ploidy and cell division. EdU injections on P8, 10, and 12 with collection at P21 and 4 weeks (Wks). **(E)** Quantifications of EdU-positive MNDCMs as a percent of total EdU-positive cardiomyocytes in A/J mice following Experimental paradigm in panel D. **(F)** Quantifications of EdU+ cardiomyocytes broken down into total DNA content (i.e. 2N, 4N, 8N, or 16N) following Experimental paradigm in panel D. Complete breakdown of N and litter contributions can be found for all experiments in Supp Table 3.

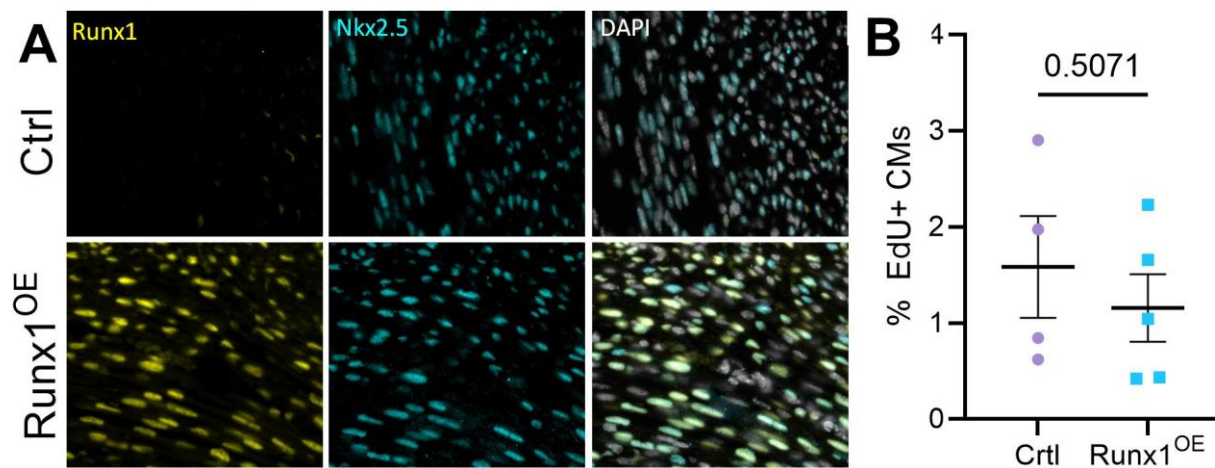

**Fig. S3. (A)** Immunofluorescent images for Runx1 (yellow), Nkx2.5 (cyan), and DAPI (greyscale) in Cre-positive Control animals (Ctrl) and Runx1<sup>OE</sup> hearts following two tamoxifen injections at P0 and P1. **(B)** Quantification of total EdU-positive cardiomyocytes in single cell suspension following EdU administration outlined in Figure 4G represented as a percent of total cardiomyocytes. N=4 Ctrl and 5 Runx1<sup>OE</sup>. P-value calculated by Student's t-test.

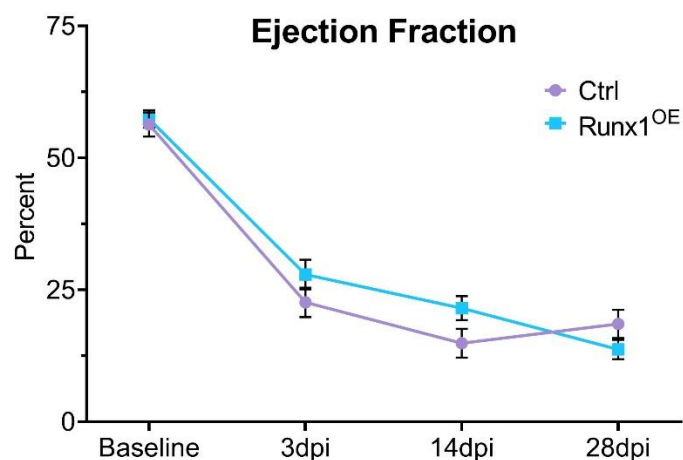

**Fig. S4.** Ejection fraction as measured by long axis B-mode traces of Cre-positive Control animals (Ctrl) and Runx1<sup>OE</sup> hearts prior to MI (baseline) and 3-, 14-, and 28-days-post-infarction (dpi). N = 10 Ctrl and 13 Runx1<sup>OE</sup>. Statistical significance was assessed by Two-way repeated measures ANOVA with Bonferroni post hoc test; no statistical significance was identified across genotypes at any time point.

**Table S1.** Summary of descriptive statistics including N, Mean, and standard error of the mean (SEM), one-way ANOVA, and Tukey HSD post hoc analyses for Figure 1A.

| <b>C57BL/6J</b>                     |           |           |         | <b>A/J</b>                     |           |           |         |
|-------------------------------------|-----------|-----------|---------|--------------------------------|-----------|-----------|---------|
| Age                                 | N         | Mean      | SEM     | Age                            | N         | Mean      | SEM     |
| P1                                  | 8         | 647,125   | 114,823 | P1                             | 8         | 643,500   | 61,030  |
| P7                                  | 11        | 1,337,273 | 59,689  | P7                             | 7         | 1,084,000 | 34,404  |
| P21                                 | 7         | 1,644,286 | 84,427  | P21                            | 16        | 1,224,813 | 83,246  |
| 6Wk                                 | 6         | 1,691,667 | 90,973  | 4Wk                            | 13        | 1,484,615 | 85,227  |
|                                     |           |           |         | 6Wk                            | 11        | 1,572,727 | 105,745 |
| <b>C57BL/6J ANOVA p &lt; 0.0001</b> |           |           |         | <b>A/J ANOVA p &lt; 0.0001</b> |           |           |         |
| Tukey post hoc test                 |           |           |         | Tukey post hoc test            |           |           |         |
| Timepoint                           | Timepoint | P-value   |         | Timepoint                      | Timepoint | P-value   |         |
| P1                                  | P7        | <0.0001   |         | P1                             | P7        | 0.0413    |         |
|                                     | P21       | <0.0001   |         |                                | P21       | 0.0003    |         |
|                                     | 6Wk       | <0.0001   |         |                                | 4Wk       | <0.0001   |         |
| P7                                  | P21       | 0.1331    |         |                                | 6Wk       | <0.0001   |         |
|                                     | 6Wk       | 0.0768    |         | P7                             | P21       | 0.8251    |         |
| P21                                 | 6Wk       | 0.9852    |         |                                | 4Wk       | 0.0401    |         |
|                                     |           |           |         |                                | 6Wk       | 0.0096    |         |
|                                     |           |           |         | P21                            | 4Wk       | 0.1387    |         |
|                                     |           |           |         |                                | 6Wk       | 0.0299    |         |
|                                     |           |           |         | 4Wk                            | 6Wk       | 0.9473    |         |

**Table S2.** Multivariate ANOVA with Tukey HSD post hoc tests for Figure 1C.

| C57Bl/6J Pillai's Trace P=0.00445 |           |           |               | A/J Pillai's Trace P=0.00337 |           |           |               |
|-----------------------------------|-----------|-----------|---------------|------------------------------|-----------|-----------|---------------|
| Ploidy class                      | Timepoint | Timepoint | Tukey P-value | Ploidy class                 | Timepoint | Timepoint | Tukey P-value |
| 2N                                | P7        | P14       | 2.24E-06      | 2N                           | P7        | P14       | 1.33E-07      |
|                                   |           | P21       | 8.46E-07      |                              |           | P21       | 1.01E-09      |
|                                   |           | 6wk       | 5.38E-07      |                              |           | 4wk       | 1.26E-06      |
|                                   | P14       | P21       | 0.686         |                              | P14       | 6wk       | 6.36E-07      |
|                                   |           | 6wk       | 0.382         |                              |           | P21       | 0.592         |
|                                   |           | P21       | 0.942         |                              |           | 4wk       | 0.362         |
| 4N                                | P7        | P14       | 0.001         | 4N                           | P21       | 4wk       | 0.007         |
|                                   |           | P21       | 5.87E-05      |                              |           | 6wk       | 0.006         |
|                                   |           | 6wk       | 6.82E-06      |                              |           | 4wk       | 1.000         |
|                                   | P14       | P21       | 0.263         |                              | P7        | P14       | 0.989         |
|                                   |           | 6wk       | 0.013         |                              |           | P21       | 0.737         |
|                                   |           | P21       | 0.269         |                              |           | 4wk       | 0.736         |
| 8N                                | P7        | P14       | 4.28E-06      | 8N                           | P14       | 6wk       | 0.999         |
|                                   |           | P21       | 3.80E-07      |                              |           | P21       | 0.958         |
|                                   |           | 6wk       | 8.69E-08      |                              |           | 4wk       | 0.954         |
|                                   | P14       | P21       | 0.073         |                              | P21       | 6wk       | 0.998         |
|                                   |           | 6wk       | 0.003         |                              |           | 4wk       | 1.000         |
|                                   |           | P21       | 0.230         |                              |           | 6wk       | 0.783         |
| 16N                               | P7        | P14       | 0.731         | 16N                          | P7        | P14       | 0.012         |
|                                   |           | P21       | 0.999         |                              |           | P21       | 0.004         |
|                                   |           | 6wk       | 0.408         |                              |           | 4wk       | 0.160         |
|                                   | P14       | P21       | 0.854         |                              | P14       | 6wk       | 0.023         |
|                                   |           | 6wk       | 0.951         |                              |           | P21       | 1.000         |
|                                   |           | P21       | 0.570         |                              |           | 4wk       | 0.531         |
| 8N                                | P7        | P14       | 0.971         | 8N                           | P21       | 4wk       | 0.379         |
|                                   |           | P21       | 0.619         |                              |           | 6wk       | 0.944         |
|                                   |           | 4wk       | 0.720         |                              |           | 4wk       | 0.900         |
|                                   | P14       | 6wk       | 0.076         |                              | P21       | 6wk       | 0.859         |
|                                   |           | P21       | 0.948         |                              |           | 4wk       | 0.977         |
|                                   |           | 4wk       | 0.977         |                              |           | 6wk       | 0.538         |
| P21                               | 4wk       | 1.000     | 4wk           | 6wk                          | 0.485     |           |               |
|                                   | 6wk       | 0.538     |               |                              |           |           |               |
|                                   | 6wk       | 0.485     |               |                              |           |           |               |

**Table S3.** Compilation of N, number of litters, and the range in litter size for each postnatal development experiment.

| Figure                      | Strain                      | Timepoint                   | N       | Number of Contributing Litters | Litter Size (Range) |     |
|-----------------------------|-----------------------------|-----------------------------|---------|--------------------------------|---------------------|-----|
| 1A                          | A/J                         | P1                          | 11      | 2                              | 7-10                |     |
|                             |                             | P7                          | 7       | 2                              | 3-4                 |     |
|                             |                             | P21                         | 14      | 5                              | 5-9                 |     |
|                             |                             | 4Wk                         | 12      | 4                              | 4-5                 |     |
|                             |                             | 6Wk                         | 11      | 5                              | 5-9                 |     |
|                             | C57Bl/6J                    | P1                          | 12      | 2                              | 7-9                 |     |
|                             |                             | P7                          | 11      | 2                              | 4-10                |     |
|                             |                             | P21                         | 7       | 2                              | 7                   |     |
| 6Wk                         | 6                           | 2                           | 7       |                                |                     |     |
| 1C&D<br>2G&H                | A/J                         | P7                          | 4       | 1                              | Unknown             |     |
|                             |                             | P14                         | 4       | 1                              | Unknown             |     |
|                             |                             | P21                         | 7       | 2                              | Unknown             |     |
|                             |                             | 4Wk                         | 6       | 2                              | Unknown             |     |
|                             |                             | 6Wk                         | 9       | 3                              | Unknown             |     |
|                             | C57Bl/6J                    | P7                          | 4       | 2                              | Unknown             |     |
|                             |                             | P14                         | 3       | 1                              | Unknown             |     |
|                             |                             | P21                         | 3       | 1                              | Unknown             |     |
|                             |                             | 6Wk                         | 3       | 1                              | Unknown             |     |
|                             |                             | 1F                          | A/J     | P4                             | 3                   | 2   |
| P7                          | 5                           |                             |         | 1                              | 7                   |     |
| P10                         | 8                           |                             |         | 2                              | 6                   |     |
| P14-20                      | 5                           |                             |         | 2                              | 3                   |     |
| P21-24                      | 3                           |                             |         | Unknown                        | Unknown             |     |
| P25-28                      | 2                           |                             | Unknown | Unknown                        |                     |     |
| C57Bl/6J                    | P4                          |                             | 5       | 1                              | 9                   |     |
|                             | P7                          |                             | 4       | 1                              | 9                   |     |
|                             | P10                         |                             | 6       | 1                              | 6                   |     |
|                             | P14-20                      |                             | 5       | Unknown                        | Unknown             |     |
|                             | P21-24                      | 4                           | Unknown | Unknown                        |                     |     |
| P25-28                      | 4                           | Unknown                     | Unknown |                                |                     |     |
| 2D-F                        | A/J                         | P21                         | 7       | 2                              | 6-7                 |     |
|                             |                             | 6Wk                         | 6       | 3                              | 6-9                 |     |
|                             | C57Bl/6J                    | P21                         | 5       | 2                              | 7                   |     |
|                             |                             | 6Wk                         | 4       | 2                              | 7                   |     |
| 3A                          | <i>Tnni3k<sup>+/+</sup></i> | P21                         | 4       | 2                              | 7-9                 |     |
|                             |                             | 4Wk                         | 3       | 2                              | 6-9                 |     |
|                             |                             | 6Wk                         | 4       | 3                              | 5-7                 |     |
|                             | <i>Tnni3k<sup>-/-</sup></i> | P21                         | 4       | 3                              | 6-9                 |     |
|                             |                             | 4Wk                         | 5       | 2                              | 5-9                 |     |
|                             |                             | 6Wk                         | 5       | 3                              | 5-7                 |     |
|                             | 3B-D                        | <i>Tnni3k<sup>+/+</sup></i> | P21     | 4                              | 2                   | 7-9 |
|                             |                             |                             | 6Wk     | 6                              | 4                   | 5-7 |
| <i>Tnni3k<sup>-/-</sup></i> |                             | P21                         | 4       | 3                              | 6-9                 |     |
|                             |                             | 6Wk                         | 5       | 3                              | 5-7                 |     |
| 4E&F                        | A/J                         | P21                         | 5       | 2                              | 3                   |     |
|                             | C57Bl/6J                    | P21                         | 5       | Unknown                        | Unknown             |     |
| 4G&H                        | Ctrl                        | 4WK                         | 4       | 2                              | 7                   |     |
|                             | <i>Runx1<sup>OE</sup></i>   | 4Wk                         | 5       | 2                              | 7                   |     |
| 4I                          | Ctrl                        | 4WK                         | 7       | 2                              | 6-7                 |     |
|                             | <i>Runx1<sup>OE</sup></i>   | 4Wk                         | 6       | 2                              | 6-7                 |     |
| Supp<br>1A (BW)             | A/J                         | P1                          | 11      | 2                              | 7-10                |     |
|                             |                             | P5                          | 4       | 2                              | 6                   |     |
|                             |                             | P7                          | 9       | 3                              | 3-6                 |     |
|                             |                             | P11                         | 8       | 2                              | 6                   |     |
|                             |                             | P21                         | 25      | 7                              | 4-10                |     |
|                             | 4Wk                         | 20                          | 6       | 4-10                           |                     |     |
|                             | C57Bl/6J                    | P1                          | 14      | 2                              | 7-9                 |     |
|                             |                             | P5                          | 6       | 1                              | 6                   |     |
|                             |                             | P7                          | 13      | 2                              | 4-10                |     |
|                             |                             | P11                         | 6       | 1                              | 6                   |     |
| 4Wk                         |                             | 6                           | 2       | 3-4                            |                     |     |
| Supp<br>1B&C                | A/J                         | P1                          | 6       | 1                              | 7                   |     |
|                             |                             | P5                          | 4       | 2                              | 6                   |     |
|                             |                             | P7                          | 7       | 2                              | 3-4                 |     |
|                             |                             | P11                         | 8       | 2                              | 6                   |     |
|                             |                             | P21                         | 11      | 4                              | 4-10                |     |
|                             | 4Wk                         | 19                          | 6       | 4-10                           |                     |     |
|                             | C57Bl/6J                    | P1                          | 14      | 2                              | 7-9                 |     |
|                             |                             | P5                          | 6       | 1                              | 6                   |     |
|                             |                             | P7                          | 13      | 2                              | 4-10                |     |
|                             |                             | P11                         | 6       | 1                              | 6                   |     |
| 4Wk                         |                             | 6                           | 2       | 3-4                            |                     |     |
| Supp<br>2B&C                | A/J                         | P21                         | 5       | 2                              | 4-10                |     |
|                             |                             | 4Wk                         | 5       | 2                              | 4-10                |     |
| Supp<br>2D&E                | A/J                         | P21                         | 4       | 1                              | 8                   |     |
|                             |                             | 4Wk                         | 4       | 1                              | 8                   |     |
